# Supplementary material for: Unveiling the atomistic and electronic structure of NiII–NO adduct in a MOF-based catalyst by EPR spectroscopy and quantum chemical modelling
Source: Royal Society of Chemistry journal article supplement (doi:10.1039/d3cp01449e), 2023-01-01
Supplement: d3cp01449e1.pdf [file d3cp01449e1.pdf]

*SUPPORTING INFORMATION*

Unveiling the atomistic and electronic structure of  
Ni<sup>II</sup>–NO adduct in MOF-based catalyst by EPR  
spectroscopy and quantum chemical modelling

*Kavipriya Thangavel,<sup>1,2‡</sup> Paolo Cleto Bruzzese,<sup>1,3‡</sup> Matthias Mendt,<sup>1</sup> Andrea Folli,<sup>2</sup> Katharina  
Knippen,<sup>4</sup> Dirk Volkmer,<sup>4</sup> Damien M. Murphy,<sup>2</sup> Andreas Pöppl<sup>1\*</sup>*

Felix Bloch Institute for Solid State Physics, Leipzig University, Linnéstraße 5, 04103  
Leipzig, Germany

School of Chemistry, Main building, Cardiff University, Cardiff CF10 3AT, UK

Institute of Physics, Solid State and Materials Chemistry, University of Augsburg,  
Universitätstraße 1, D-86159 Augsburg, Germany

# Table of contents

|                                                                                                                                               |     |
|-----------------------------------------------------------------------------------------------------------------------------------------------|-----|
| 1. Structural characterizations .....                                                                                                         | S1  |
| 2. Simulation of Q- and W- band EPR spectra of Ni <sup>II</sup> in Ni-MFU-4l-NO <sub>2</sub> .....                                            | S2  |
| 3. Geometry optimization of Ni-MFU-4l-NO <sub>2</sub> and Ni-MFU-4l-Cl.....                                                                   | S3  |
| 4. Temperature dependent CW X-band data of NO adsorbed Ni-MFU-4l-NO <sub>2</sub> .....                                                        | S4  |
| 5. Optimized structure of Ni <sup>II</sup> -NO versus Zn <sup>II</sup> -NO adsorption complexes in Ni-MFU-4l-NO <sub>2</sub> .                | S7  |
| 6. Experimental and simulated <sup>14</sup> N ENDOR spectra of the Ni <sup>II</sup> -NO adsorption complex in Ni-MFU-4l-NO <sub>2</sub> ..... | S8  |
| 7. Computed and experimental IR spectra for Ni-MFU-4l-NO <sub>2</sub> and Ni-MFU-4l-Cl .....                                                  | S10 |
| 8. Contour plots of natural CASSCF(11e,11o) orbitals of the Ni <sup>II</sup> -NO adsorption complex ...                                       | S11 |
| 9. Comparison of EPR spectra with different amounts of NO loading over Ni-MFU-4l-NO <sub>2</sub> .....                                        | S12 |
| 10. Supplementary References.....                                                                                                             | S12 |

# 1. Structural characterizations

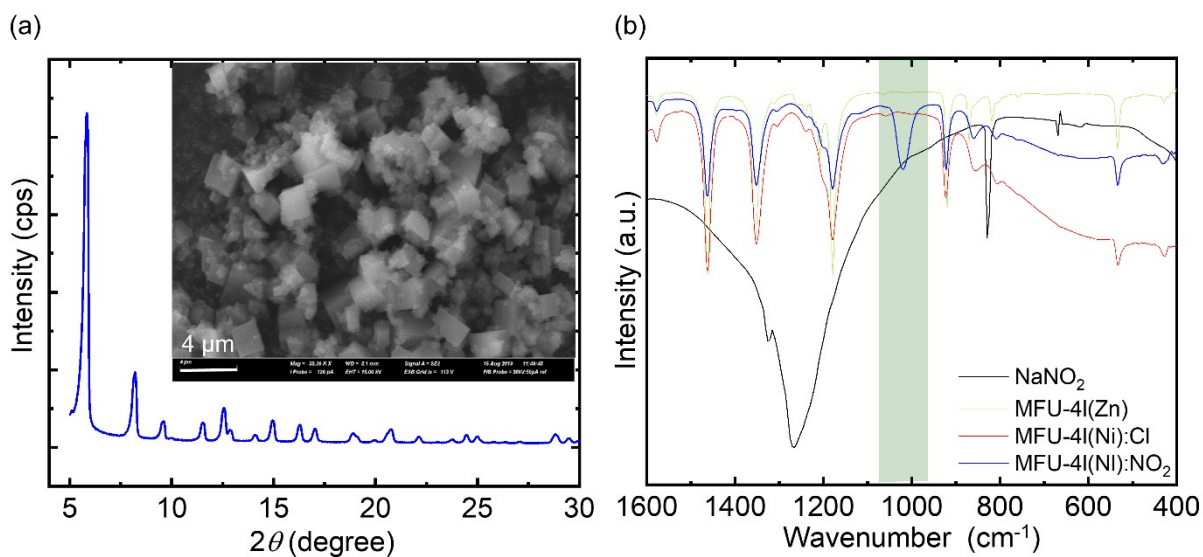

**Figure S1.** (a) PXRD and SEM image (inset: scale bar - 4  $\mu\text{m}$ ) of Ni-MFU-4l: $\text{NO}_2$  and (b) IR spectra comparison of various MFU-4l materials

IR bands of Ni-MFU-4l- $\text{NO}_2$  ( $\text{cm}^{-1}$ ): 1625 (w), 1575 (w), 1461 (vs), 1351 (vs), 1210 (sh), 1183 (vs), 1025 (w), 922 (s), 867 (m), 817 (m), 535 (m), 430 (w) matches with the reported values,<sup>1</sup> where, w, s, m, vs, sh indicates weak, strong, medium, very strong and shoulder, respectively.

## 2. Simulation of Q- and W- band EPR spectra of Ni<sup>II</sup> in Ni-MFU-4l-NO<sub>2</sub>

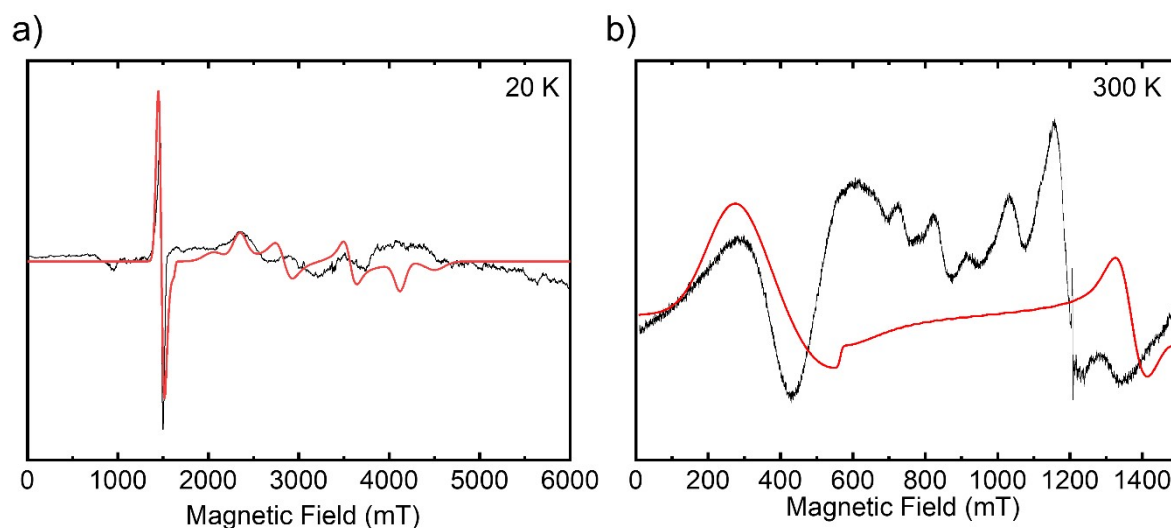

**Figure S2.** (a) W-band and (b) Q-band EPR spectra (black) and simulation (red) of the spin  $S = 1$  of Ni<sup>II</sup> in Ni-MFU-4l-NO<sub>2</sub> with the spin Hamiltonian parameters  $g_{xx} = 2.050(5)$ ,  $g_{yy} = 2.055(6)$ ,  $g_{zz} = 2.060(5)$ ,  $D = 35.5(5)$  GHz and  $E = 0.5$  GHz. (the extra signals of Q-band data are from the EPR cavity and the radical from the MOF sample.)

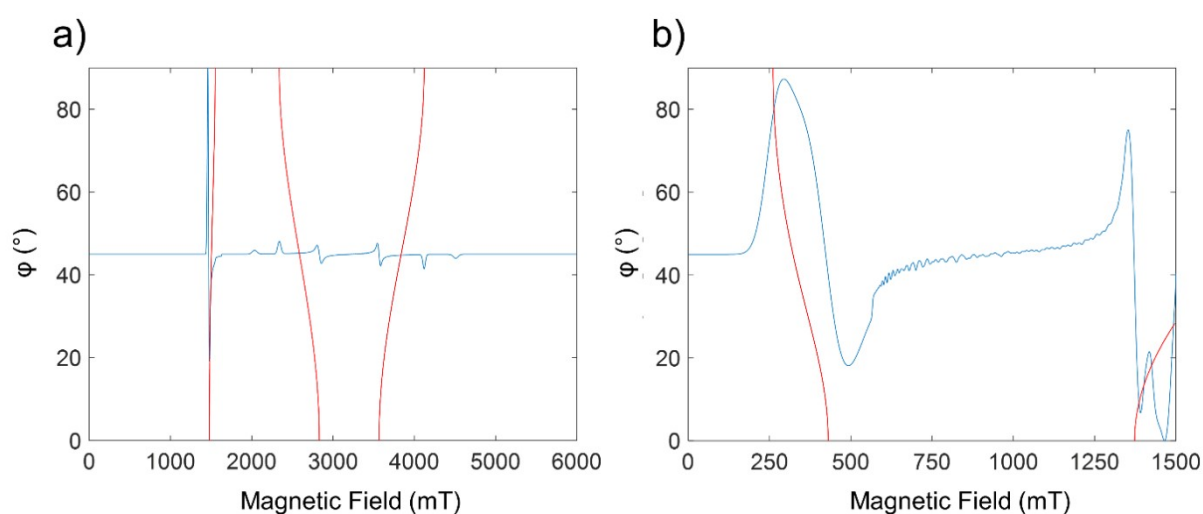

**Figure S3.** Angular dependent road map for the  $S = 1$  Ni<sup>II</sup> species at (a) W-band and (b) Q-band frequency (Blue - simulated EPR spectra with spin Hamiltonian parameters  $g_{\text{iso}} = 2.05$ ,  $D = 35500$  MHz and  $E = 5000$  MHz; Red - Road map of the expected spectral position).

### 3. Geometry optimization of Ni-MFU-41-NO<sub>2</sub> and Ni-MFU-41-Cl

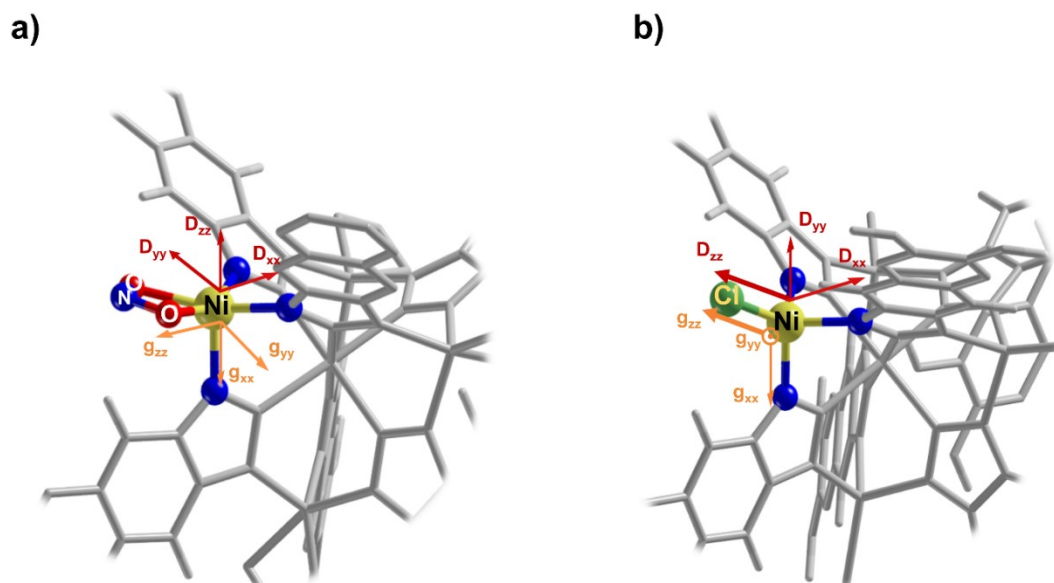

**Figure S4.** Geometry optimized periodic structures at B3LYP-D3/pob-TZVP-rev2 of (a) Ni-MFU-41-NO<sub>2</sub> and (b) Ni-MFU-41-Cl. The computed *g*- and *D*-frames are also reported. Nitrogen and oxygen atoms are shown in blue and red, respectively. The other atoms are labelled in the figures.

## 4. Temperature dependent CW X-band data of NO adsorbed Ni-MFU-41-NO<sub>2</sub>

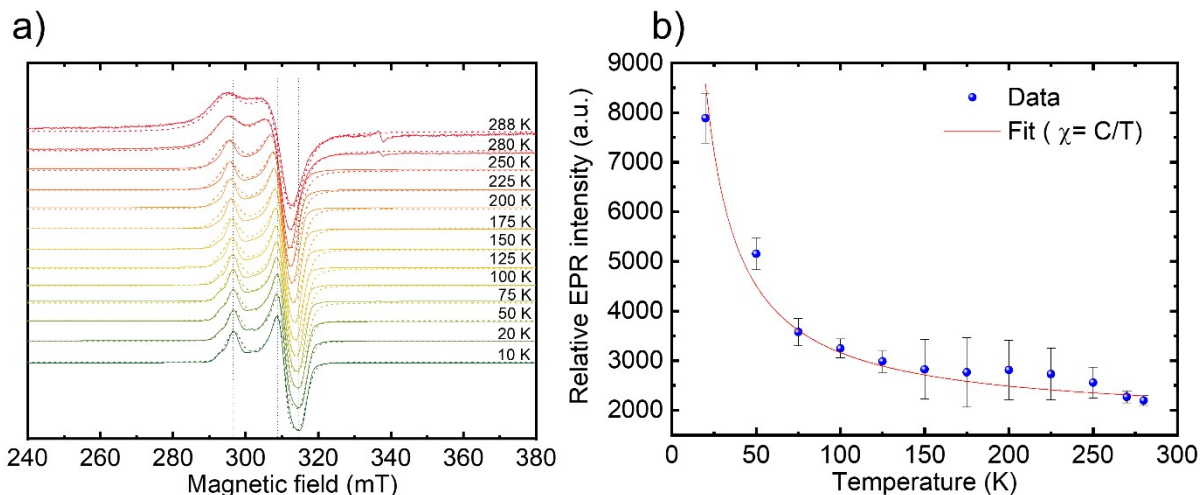

**Figure S5.** (a) Temperature-dependent X-band EPR spectra of NO adsorbed over Ni-MFU-41-NO<sub>2</sub> ranging from temperature 10 K to 288 K (solid line – experimental data and dotted line – simulation of the sum of two different species A and B) and (b) Intensity corresponds to magnetic susceptibility as a function of temperature, extracted from double integration of full range temperature dependent EPR data (fit – red: paramagnetic susceptibility fit). The small signal around ~340 mT corresponds to the radical.

**Table S1.** Experimental spin Hamiltonian parameters for the Ni<sup>II</sup>-NO adduct in Ni-MFU-41-NO<sub>2</sub> of species A recorded at several temperatures. (Gaussian ( $\Delta B_G^{pp}$ ) and Lorentzian ( $\Delta B_L^{pp}$ ) broadening)

| $T$ (K) | $g_{xx}$  | $g_{yy}$   | $g_{zz}$  | $\Delta B_G^{pp}$ (mT) | $\Delta B_L^{pp}$ (mT) |
|---------|-----------|------------|-----------|------------------------|------------------------|
| 10      | 2.1358(5) | 2.1672(5)  | 2.2705(5) | 2.1(1)                 | 0.8(1)                 |
| 20      | 2.1358(5) | 2.1672(5)  | 2.2705(5) | 2.1(1)                 | 0.8(1)                 |
| 50      | 2.1358(4) | 2.1672(5)  | 2.2705(5) | 2.1(1)                 | 0.8(1)                 |
| 75      | 2.1358(4) | 2.1672(5)  | 2.2720(5) | 2.1(1)                 | 1.1(1)                 |
| 100     | 2.1376(6) | 2.1672(6)  | 2.2727(6) | 2.1(1)                 | 1.1(1)                 |
| 125     | 2.1385(5) | 2.1685(7)  | 2.2745(4) | 2.1(1)                 | 1.20(7)                |
| 150     | 2.1392(8) | 2.1690(7)  | 2.2757(6) | 2.1(1)                 | 1.35(6)                |
| 175     | 2.1410(6) | 2.1692(9)  | 2.2766(5) | 2.1(1)                 | 1.35(10)               |
| 200     | 2.1446(6) | 2.1710(7)  | 2.2780(8) | 2.1(1)                 | 1.40(7)                |
| 225     | 2.1498(8) | 2.1725(10) | 2.2788(8) | 2.2(2)                 | 1.45(10)               |
| 250     | 2.1518(9) | 2.1740(8)  | 2.2800(9) | 2.3(3)                 | 2.0(1)                 |
| 280     | 2.1545(4) | 2.1745(6)  | 2.2820(9) | 2.3(4)                 | 3.3(2)                 |
| 288     | 2.1545(7) | 2.1745(5)  | 2.2850(6) | 2.5(5)                 | 4.20(10)               |

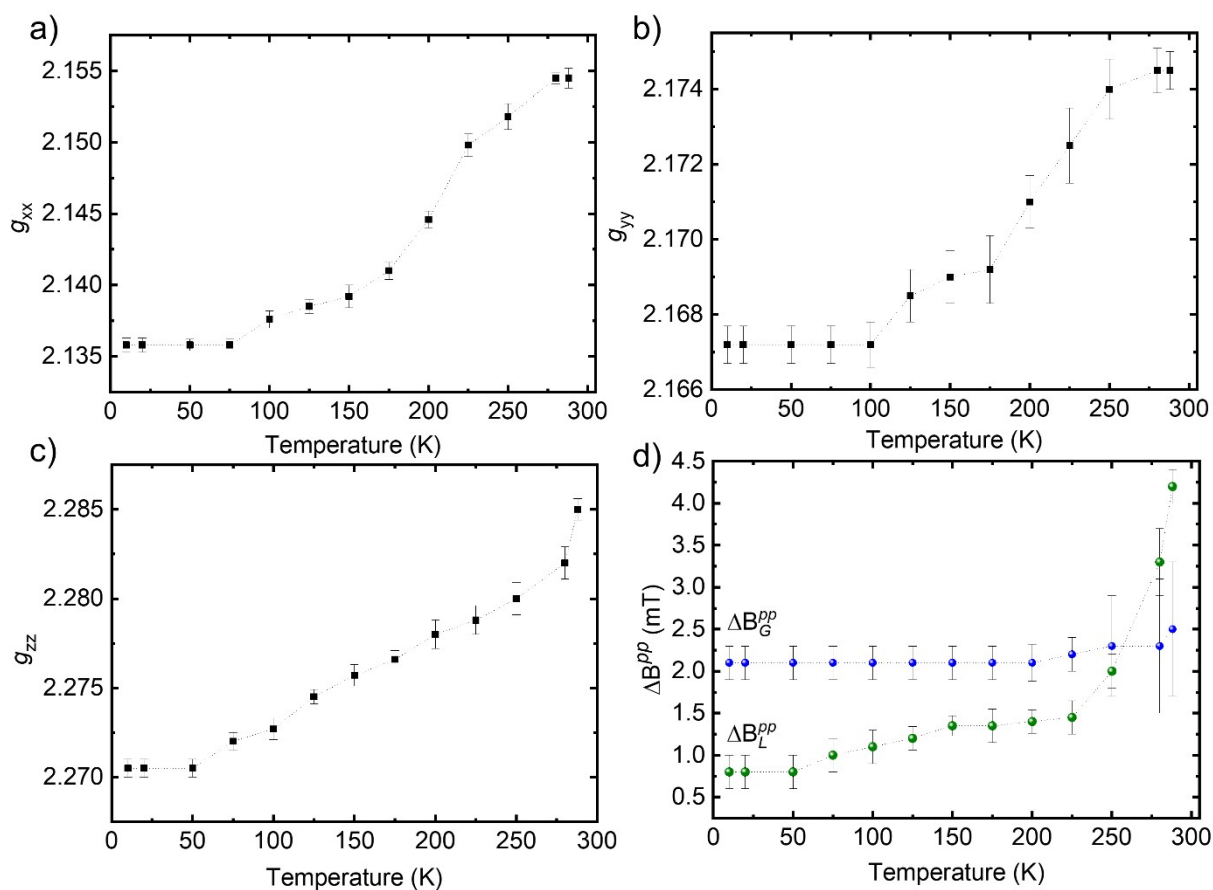

**Figure S6.** The temperature-dependent trend of  $g$ -tensor parameters (a)  $g_{xx}$ , (b)  $g_{yy}$ , (c)  $g_{zz}$  and (d) Gaussian (blue) and Lorentzian (black) linewidth for NO adsorbed Ni-MFU-4L-NO<sub>2</sub> system (species A).

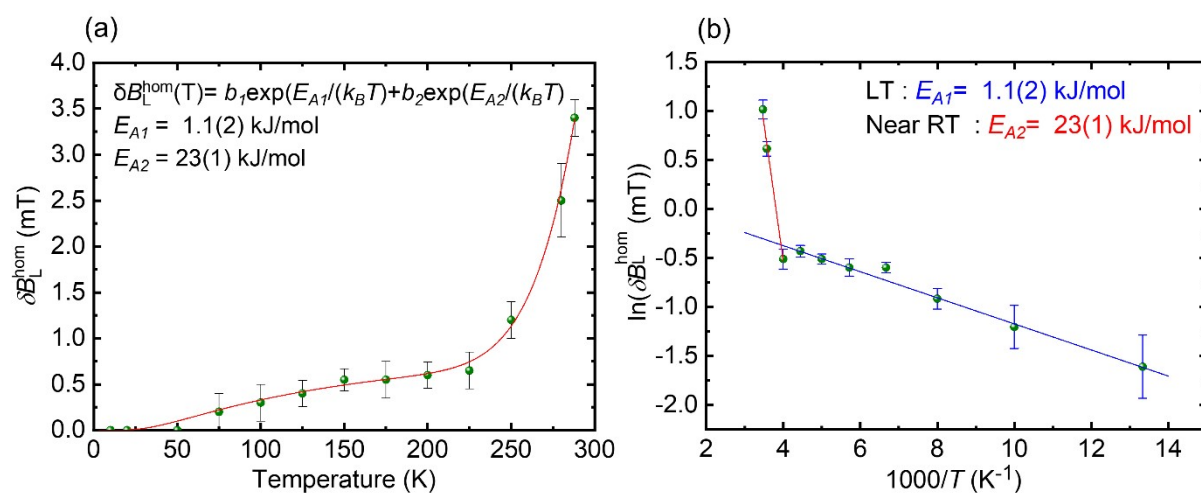

**Figure S7.** Arrhenius plot of the homogeneous (a) EPR linewidths,  $\delta B_L^{hom}$  and (b)  $\ln(\delta B_L^{hom})$  of Ni<sup>II</sup>-NO adduct in Ni-MFU-4L-NO<sub>2</sub>. The activation energies were found to be  $E_{A1} = 1.1(2)$  kJ/mol for the lower temperature range (75 K – 250 K) and  $E_{A2} = 23(1)$  kJ/mol for the higher temperature range (250 K – 288 K).  $\delta B_L^{hom}(T) = \delta^{total} B_i(T) - \delta^{total} B_i(50 K)$

All three principal values  $g_{ii}$  of the  $\mathbf{g}$ -tensor of the Ni<sup>II</sup>-NO species A in Ni-MFU-41-NO<sub>2</sub> as determined by spectral simulations (Table S1) increase with rising temperature (Fig. S6a-c). Such temperature-dependent  $\mathbf{g}$ -tensor but also  $\mathbf{hfi}$  tensor parameters of paramagnetic transition metal ions or adsorption complexes in solids can be caused by motional effects of these species either related to lattice vibrations or internal motional processes. However, these motional processes result in a partial averaging of the principal values.<sup>2,3</sup> In the case of Ni-MFU-41-NO<sub>2</sub>, all three parameters  $g_{ii}$  of the Ni<sup>II</sup>-NO adsorption complex increase with temperature, and no averaging of the principal values is observed. Therefore, we rather suggest that temperature-dependent enhancements of the mean values of the nitrogen–metal ion bond length in the nickel coordination might lead to the observed temperature dependence of the  $g_{ii}$  parameters. These would result in smaller energy splitting  $\Delta_j$  between the  $(3d_{x^2-y^2})$  ground state and the excited states giving rise to an increase of all three parameters  $g_{ii}$  (eq. 3).

The spectral simulations also revealed that the total linewidth of the EPR signal of the Ni<sup>II</sup>-NO species A in Ni-MFU-41-NO<sub>2</sub> is composed of a Gaussian  $\Delta B_G^{pp}$  and a Lorentzian  $\Delta B_L^{pp}$  linewidth contribution (Table S1) (Figure S6d). Whereas the Gaussian linewidth  $\Delta B_G^{pp}$ , usually associated with an inhomogeneous line broadening, appears to be temperature independent within the error margin of the simulations, the Lorentzian linewidth contribution indicating homogeneous broadening increases at a temperature above  $T > 50$  K. For the later, we calculated the temperature-dependent contribution  $\delta B_L^{hom}(T)$  to the total Lorentzian line broadening according to

$$\delta B_L^{hom}(T) = \Delta B_L^{pp}(T) - \Delta B_L^{pp}(T = 50 \text{ K}) \quad (\text{S1})$$

presented in Figure S7.  $\delta B_L^{hom}(T)$  seems to be determined by two temperature-dependent processes, both following approximately an Arrhenius-type behavior

$$\delta B_L^{hom}(T) = b_1 \exp\left(-\frac{E_{A1}}{k_B T}\right) + b_2 \exp\left(-\frac{E_{A2}}{k_B T}\right) \quad (\text{S2})$$

with the absolute values of  $E_{A1} = 1.1(2)$  kJ/mol (11(2) meV),  $E_{A2} = 23(1)$  kJ/mol (240(35) meV),  $b_1 = 1$  mT,  $b_2 = 42974$  mT, and the Boltzmann constant  $k_B$ . Elucidation of the exact nature of the two motional processes is beyond the scope of this work, but we may assume that they might be related to spin-lattice relaxation ( $E_{A1}$ ) and starting desorption processes of NO at elevated temperatures ( $E_{A2}$ ).



## 5. Optimized structure of Ni<sup>II</sup>-NO versus Zn<sup>II</sup>-NO adsorption complexes in Ni-MFU-41-NO<sub>2</sub>

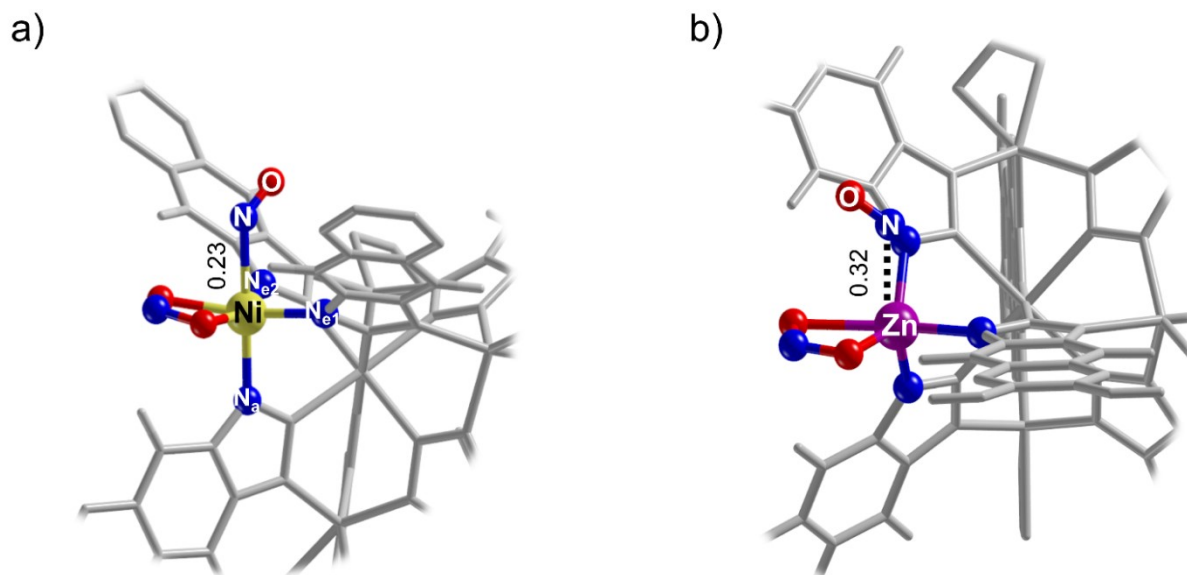

**Figure S8.** Atomistic structure of NO adsorbed on Ni-MFU-41-NO<sub>2</sub>. (a) Ni<sup>II</sup>-NO and (b) Zn<sup>II</sup>-NO binding sites. The metal-nitrosyl bond distances are reported in nm together with the computed relative electronic energy for the two configurations.

## 6. Experimental and simulated $^{14}\text{N}$ ENDOR spectra of the $\text{Ni}^{\text{II}}\text{-NO}$ adsorption complex in $\text{Ni-MFU-41-NO}_2$

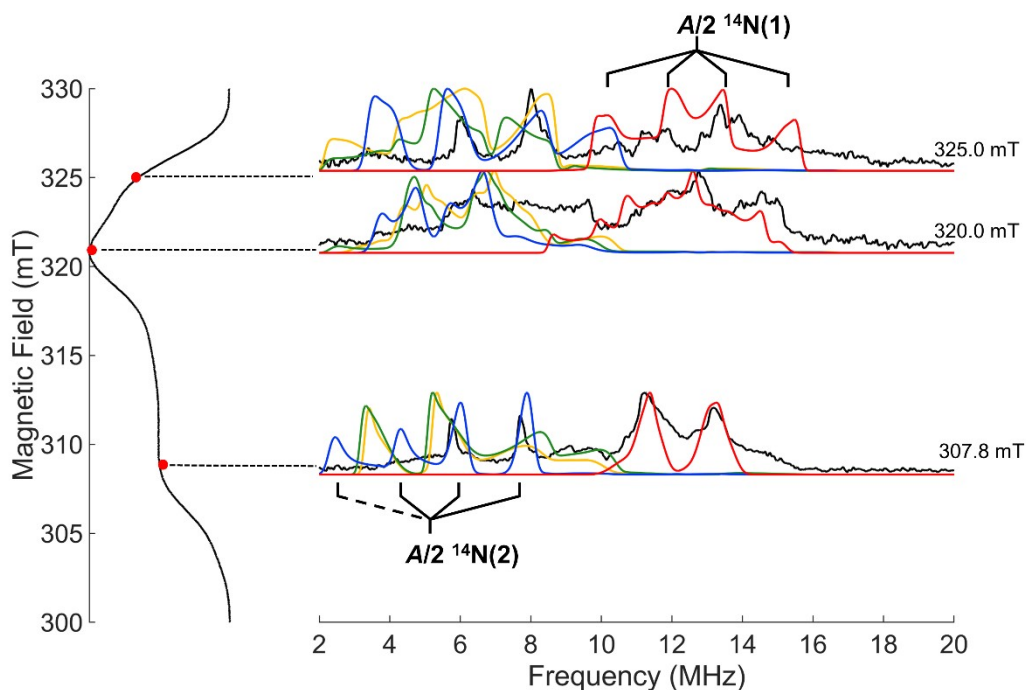

**Figure S9.** X-band  $^{14}\text{N}$  ENDOR spectra simulation of the  $\text{Ni}^{\text{II}}\text{-NO}$  species in  $\text{Ni-MFU-41-NO}_2$  highlighting the contribution of each  $^{14}\text{N}$  species. The black lines are the experimental spectra. The ESE spectrum with the corresponding field position sampled is plotted on the left. The blue, green and yellow lines represent the simulation obtained with the spin Hamiltonian of  $^{14}\text{N}(2)$  by using the orientation computed from  $N_{\text{f1}}$ ,  $N_{\text{f2}}$  and  $N_{\text{f3}}$ , respectively. The red line is obtained by using the spin Hamiltonian parameters of  $^{14}\text{N}(1)$ .

**Table S2.** Computed Euler rotation of hyperfine ( $\alpha$ ,  $\beta$ ,  $\gamma$ ) and quadrupolar tensors ( $\alpha'$ ,  $\beta'$ ,  $\gamma'$ ) to the  $g$ -tensor. First rotation by  $\alpha$  around  $z$ ; second rotation by  $\beta$  around  $y'$ ; third rotation by  $\gamma$  around  $z''$ . A positive sign corresponds to a clockwise rotation, a negative sign to a counterclockwise rotation. The tensor values (calculated at CASSCF level of theory) are in MHz, while angles (calculated at DFT level of theory) are in degrees.

| $g$ -tensor |       |       | $^{14}\text{N}$ $A$ -tensor |       |       |          |         |          | $^{14}\text{N}$ $Q$ -tensor |           |          |           |      |       |
|-------------|-------|-------|-----------------------------|-------|-------|----------|---------|----------|-----------------------------|-----------|----------|-----------|------|-------|
|             |       |       | $A_x$                       | $A_y$ | $A_z$ | $\alpha$ | $\beta$ | $\gamma$ |                             | $\alpha'$ | $\beta'$ | $\gamma'$ |      |       |
| 2.226       | 2.255 | 2.276 | $N_{\text{NO}}$             | -14.8 | -14.3 | -24.9    | 79.0    | 11.7     | -106.3                      | 5.0       | 0.3      | 140.0     | 12.9 | -98.9 |
|             |       |       | $N_{\text{fl}}$             | 8.4   | 8.6   | 12.7     | -136.7  | 50.4     | 114.7                       | 4.7       | 0.5      | -140.0    | 49.2 | 132.3 |
|             |       |       | $N_{\text{l2}}$             | 8.1   | 8.3   | 12.4     | 42.7    | 30.8     | -56.4                       | 4.6       | 0.4      | 21.1      | 18.7 | -41.5 |
|             |       |       | $N_{\text{B}}$              | 6.8   | 6.9   | 10.4     | -120.7  | 13.2     | 138.6                       | 4.3       | 0.4      | -146.7    | 19.6 | 154.4 |
|             |       |       | $N_{\text{s}}$              | 0.4   | 0.3   | 1.2      | -48.4   | 14.6     | 53.1                        | 5.8       | 0.5      | 84.2      | 39.3 | -80.2 |

## 7. Computed and experimental IR spectra for Ni-MFU-4l-NO<sub>2</sub> and Ni-MFU-4l-Cl

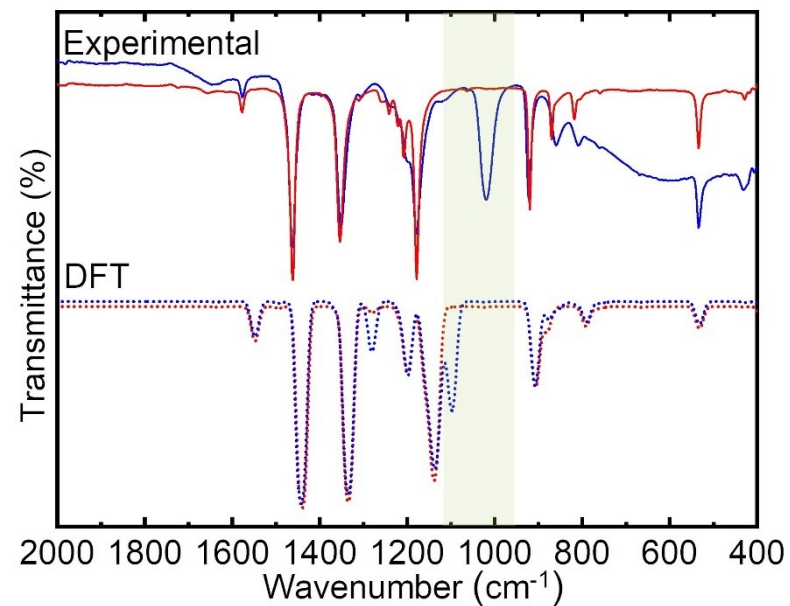

**Figure S10.** Calculated (at B3LYP-D3(ABC)/pob-TZVP-rev2 level of theory) and experimental comparison of IR spectra for the Ni-MFU-4l-NO<sub>2</sub> (blue spectra) and Ni-MFU-4l-Cl (red spectra) samples.

## 8. Contour plots of natural CASSCF(11e,11o) orbitals of the Ni<sup>II</sup>-NO adsorption complex

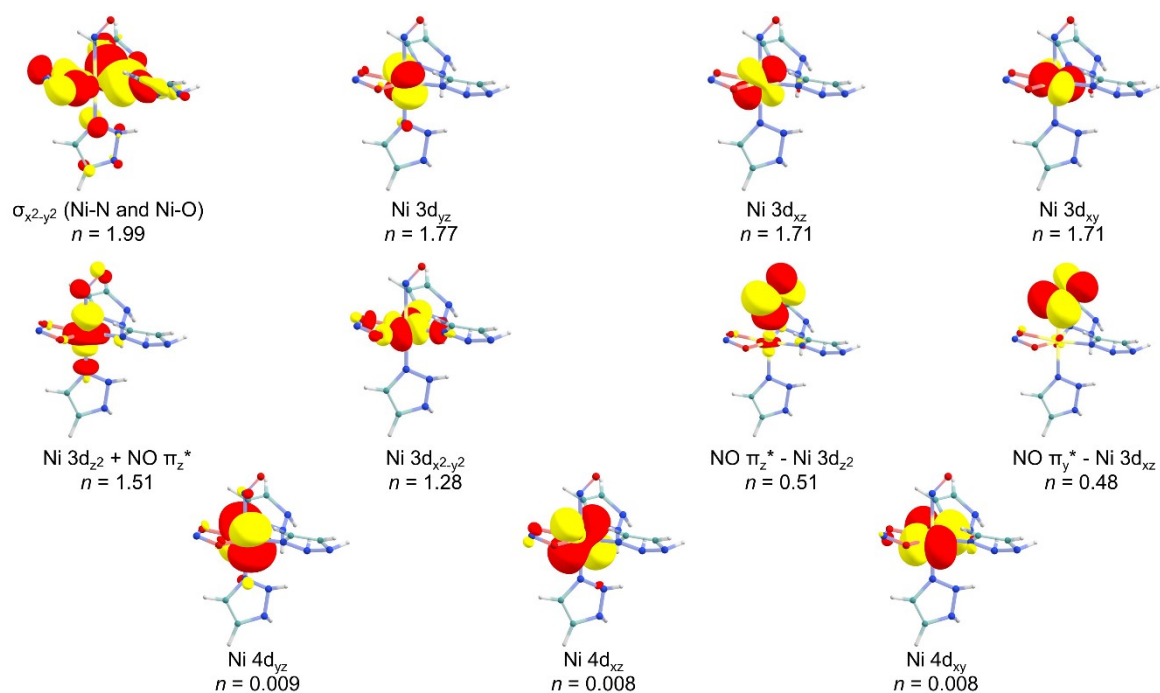

**Figure S11.** Contour plots ( $\pm 0.03$  a.u.) of natural CASSCF(11e,11o) orbitals with indicated qualitative character and fractional occupation number ( $n$ ). N, O, Ni, C, Zn and H atoms are reported in blue, red, yellow, green, violet and white, respectively.

## 9. Comparison of EPR spectra with different amounts of NO loading over Ni-MFU-4l-NO<sub>2</sub>

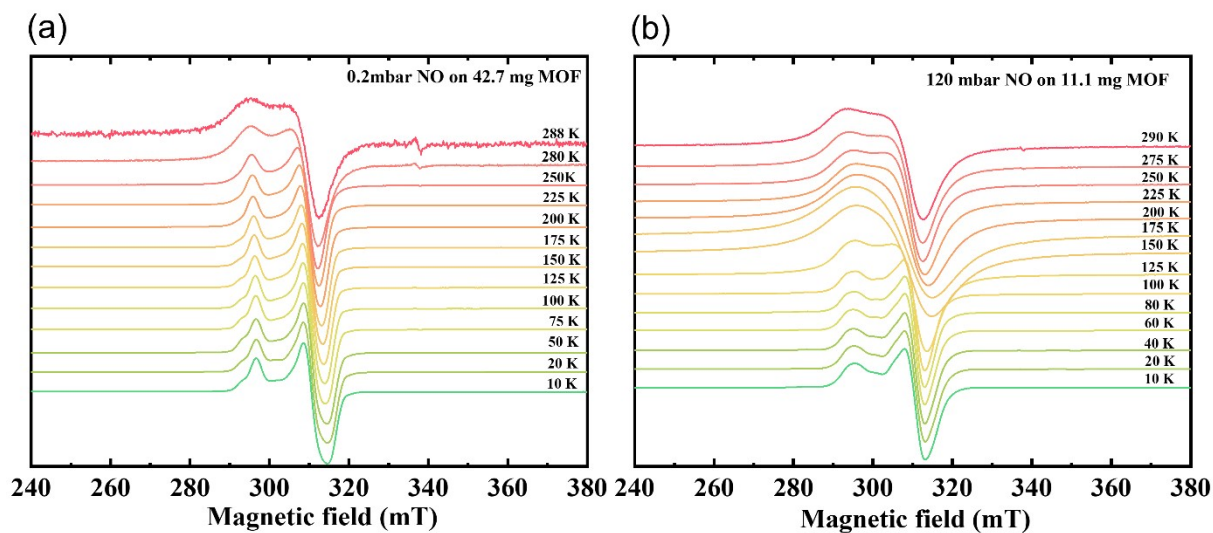

**Figure S12.** Temperature-dependent X-band EPR spectra of NO adsorbed over Ni-MFU-4l-NO<sub>2</sub> (a) with 0.2 and (b) 120 mbar

## Supplementary References

1. D. Denysenko and D. Volkmer, *Faraday Tras.*, 2017, **201**, 101.
2. A. Gutsze, M. Plato, H.G. Karge and F. Witzel, *Faraday Tras.*, 1996, **92**(13), 2495.
3. T. Rudolf, A. Pöpl, W. Brunner and D. Michel, *Magn. Reson. Chem.*, 1999, **37**(13), S93-S99.
